# Supplementary material for: Test-Retest Reliability of Web-Based Retrospective Self-Report of Tobacco Exposure and Risk
Source: J Med Internet Res. 2009 Aug 11;11(3):e35. doi: 10.2196/jmir.1248 (PMC2762856; doi:10.2196/jmir.1248)
Supplement: Supplementary file 3 [file jmir_v11i3e35_app3.pdf]

**Supplementary Table 1.** Sex-based comparison of 2-month test-retest reliability of self-report of respondent characteristics and tobacco use.

|                                   | Men (n = 590)   |              | Women (n = 634) |               | Sex comparison         |                   |        |         |
|-----------------------------------|-----------------|--------------|-----------------|---------------|------------------------|-------------------|--------|---------|
|                                   | ICC or $\kappa$ | (CI) or SE   | ICC or $\kappa$ | (CI) or SE    | Reliability difference | CI for difference | t test | P value |
| <b>Respondent characteristics</b> |                 |              |                 |               |                        |                   |        |         |
| Education                         | $\kappa = 0.89$ | (0.86, 0.92) | $\kappa = 0.90$ | (0.88, 0.93)  | 0.017                  | -0.02, 0.06       | 0.69   | .41     |
| Race/ethnicity <sup>a</sup>       | $\kappa = 0.86$ | (0.80, 0.91) | $\kappa = 0.88$ | (0.82, 0.94)  | 0.016                  | -0.07, 0.10       | 0.15   | .70     |
| <b>Frequency of tobacco use</b>   |                 |              |                 |               |                        |                   |        |         |
| Cigarettes                        | $\kappa = 0.49$ | (0.38, 0.59) | $\kappa = 0.34$ | (0.21, 0.46)  | 0.150                  | -0.31, 0.01       | 3.33   | .07     |
| Cigars                            | $\kappa = 0.47$ | (0.36, 0.58) | $\kappa = 0.38$ | (0.20, 0.55)  | 0.095                  | -0.30, 0.11       | 0.80   | .37     |
| Smokeless                         | $\kappa = 0.61$ | (0.49, 0.74) | $\kappa = 0.56$ | (0.34, 0.78)  | 0.050                  | -0.31, 0.21       | 0.15   | .70     |
| Pipe                              | $\kappa = 0.49$ | (0.35, 0.63) | $\kappa = 0.55$ | (0.31, 0.79)  | 0.061                  | -0.22, 0.34       | 0.19   | .67     |
| <b>Early use of tobacco</b>       |                 |              |                 |               |                        |                   |        |         |
| Age first tobacco use             | ICC = 0.78      | 0.02         | ICC = 0.84      | 0.01          | 0.060                  | 0.02, 0.10        | 9.00   | .00     |
| Type of tobacco first tried       | $\kappa = 0.51$ | (0.37, 0.65) | $\kappa = 0.28$ | (-0.16, 0.72) | 0.227                  | -0.69, 0.23       | 0.93   | .34     |

(Supplementary Table 1, continued)

|                                                                           | Male (n = 590) |      | Female (n = 634) |      | Sex comparison         |                   |        |         |
|---------------------------------------------------------------------------|----------------|------|------------------|------|------------------------|-------------------|--------|---------|
|                                                                           | ICC            | SE   | ICC              | SE   | Reliability difference | CI for difference | t test | P value |
| <b>Experienced at first use of tobacco, scaled score (1 – 5)</b>          |                |      |                  |      |                        |                   |        |         |
| Dizzy                                                                     | 0.46           | 0.03 | 0.55             | 0.03 | 0.09                   | -0.01, 0.18       | 3.41   | .07     |
| Lightheaded                                                               | 0.46           | 0.03 | 0.52             | 0.03 | 0.06                   | -0.03, 0.16       | 1.82   | .18     |
| Nauseated                                                                 | 0.56           | 0.03 | 0.53             | 0.03 | 0.03                   | -0.12, 0.05       | 0.58   | .45     |
| Enjoyed it                                                                | 0.50           | 0.03 | 0.51             | 0.03 | 0.02                   | -0.07, 0.11       | 0.15   | .70     |
| Coughing/choking                                                          | 0.52           | 0.03 | 0.50             | 0.03 | 0.03                   | -0.12, 0.06       | 0.32   | .57     |
| Liked taste                                                               | 0.55           | 0.03 | 0.47             | 0.04 | 0.08                   | -0.17, 0.01       | 2.99   | .08     |
| Felt bad                                                                  | 0.51           | 0.03 | 0.50             | 0.03 | 0.01                   | -0.11, 0.08       | 0.08   | .78     |
| Relaxed/calm                                                              | 0.37           | 0.04 | 0.34             | 0.04 | 0.03                   | -0.14, 0.08       | 0.26   | .61     |
| Irritated throat                                                          | 0.52           | 0.03 | 0.46             | 0.04 | 0.06                   | -0.15, 0.04       | 1.40   | .24     |
| Head rush/buzz                                                            | 0.45           | 0.04 | 0.60             | 0.03 | 0.15                   | 0.06, 0.24        | 11.3   | .00     |
| Felt good                                                                 | 0.40           | 0.04 | 0.35             | 0.04 | 0.05                   | -0.16, 0.06       | 0.83   | .36     |
| Difficulty inhaling                                                       | 0.35           | 0.04 | 0.47             | 0.04 | 0.12                   | 0.02, 0.22        | 5.17   | .02     |
| Liked smell                                                               | 0.54           | 0.03 | 0.45             | 0.04 | 0.09                   | -0.18, 0.01       | 3.43   | .06     |
| <b>Weekly use of cigarettes</b>                                           |                |      |                  |      |                        |                   |        |         |
| Age first smoked at least weekly                                          | 0.92           | 0.01 | 0.79             | 0.02 | 0.14                   | -.18, .10         | 46.5   | .00     |
| Cigarettes/week at first weekly smoking (male, n = 232; female, n = 322 ) | 0.49           | 0.04 | 0.52             | 0.05 | 0.04                   | -.09, .16         | 0.30   | .59     |
| <b>Daily use of cigarettes</b>                                            |                |      |                  |      |                        |                   |        |         |
| Age at first used daily, years                                            | 0.81           | 0.02 | 0.84             | 0.02 | 0.04                   | -.01, .08         | 2.55   | .11     |
| Cigarettes/day when started daily use (male, n = 210, female, n = 305)    | 0.42           | 0.05 | 0.46             | 0.05 | 0.04                   | -.10, .18         | 0.38   | .54     |
| <b>Pack-years</b>                                                         | 0.66           | 0.03 | 0.81             | 0.02 | 0.15                   | .07, .23          | 13.69  | .00     |

**Note.** CI, confidence interval; ICC, intraclass correlation coefficient; SE, standard error; <sup>a</sup>Includes responses of *unsure* or *decline to state*. Reliability was not calculated for respondent characteristic variables Age and Sex because variables were used for screening.

**Supplementary Table 2.** Age group comparison of 2-month test-retest reliability of self-report of respondent characteristics and tobacco use.

|                                                                                    | Younger (n = 422) |              | Middle (n = 400) |              | Older (n = 402) |              | Age comparison |         |
|------------------------------------------------------------------------------------|-------------------|--------------|------------------|--------------|-----------------|--------------|----------------|---------|
|                                                                                    | ICC or $\kappa$   | (CI) or SE   | ICC or $\kappa$  | (CI) or SE   | ICC or $\kappa$ | (CI) or SE   | Chi-square     | P value |
| <b>Respondent characteristics</b>                                                  |                   |              |                  |              |                 |              |                |         |
| Education                                                                          | $\kappa = 0.88$   | (0.84, 0.91) | $\kappa = 0.91$  | (0.88, 0.94) | $\kappa = 0.91$ | (0.87, 0.94) | 2.24           | .33     |
| Race/ethnicity                                                                     | $\kappa = 0.90$   | (0.86, 0.95) | $\kappa = 0.91$  | (0.84, 0.99) | $\kappa = 0.89$ | (0.79, 0.99) | 0.09           | .96     |
| <b>Frequency of tobacco use</b>                                                    |                   |              |                  |              |                 |              |                |         |
| Cigarettes                                                                         | $\kappa = 0.39$   | (0.26, 0.51) | $\kappa = 0.47$  | (0.33, 0.61) | $\kappa = 0.40$ | (0.24, 0.57) | 0.83           | .66     |
| Cigars                                                                             | $\kappa = 0.46$   | (0.30, 0.62) | $\kappa = 0.33$  | (0.15, 0.51) | $\kappa = 0.53$ | (0.39, 0.68) | 2.86           | .24     |
| Smokeless                                                                          | $\kappa = 0.56$   | (0.41, 0.72) | $\kappa = 0.52$  | (0.31, 0.74) | $\kappa = 0.81$ | (0.63, 0.99) | 5.55           | .06     |
| Pipe                                                                               | $\kappa = 0.49$   | (0.29, 0.70) | $\kappa = 0.38$  | (0.11, 0.66) | $\kappa = 0.58$ | (0.41, 0.76) | 1.51           | .47     |
| <b>Early use of tobacco</b>                                                        |                   |              |                  |              |                 |              |                |         |
| Age at first tobacco use                                                           | ICC = 0.77        | 0.02         | ICC = 0.81       | 0.02         | ICC = 0.85      | 0.01         | 9.61           | .01     |
| Type of tobacco first tried                                                        | $\kappa = 0.39$   | (0.22, 0.55) | $\kappa = 0.30$  | (0.12, 0.48) | $\kappa = 0.30$ | (0.10, 0.51) | 0.65           | .72     |
| <b>Weekly use of cigarettes</b>                                                    |                   |              |                  |              |                 |              |                |         |
| Age first smoked at least weekly                                                   | ICC = 0.90        | .01          | ICC = 0.90       | 0.01         | ICC = 0.89      | 0.01         | 0.34           | .85     |
| Cigarettes/week at first weekly smoking (younger = 152, middle = 180, older = 222) | ICC = 0.37        | .07          | ICC = 0.49       | 0.06         | ICC = 0.56      | 0.05         | 5.32           | .07     |

(Supplementary Table 2, continued)

|                                                                                  | Younger (n = 422) |            | Middle (n = 400) |            | Older (n = 402) |            | Age comparison |         |
|----------------------------------------------------------------------------------|-------------------|------------|------------------|------------|-----------------|------------|----------------|---------|
|                                                                                  | ICC or $\kappa$   | (CI) or SE | ICC or $\kappa$  | (CI) or SE | ICC or $\kappa$ | (CI) or SE | Chi-square     | P value |
| <b>Daily use of cigarettes</b>                                                   |                   |            |                  |            |                 |            |                |         |
| Age first used daily, years                                                      | ICC = 0.91        | 0.01       | ICC = 0.82       | 0.02       | ICC = 0.79      | 0.02       | 33.73          | .00     |
| Cigarettes/day when started daily use (younger = 133, middle = 169, older = 213) | ICC = 0.43        | 0.07       | ICC = 0.39       | 0.07       | ICC = 0.52      | 0.05       | 2.65           | .27     |
| Pack-years                                                                       | ICC = 0.89        | 0.02       | ICC = 0.66       | 0.04       | ICC = 0.68      | 0.04       | 39.3           | .00     |
| <b>Experienced at first use of tobacco (scaled score 1–5)</b>                    |                   |            |                  |            |                 |            |                |         |
| Dizzy                                                                            | ICC = 0.48        | 0.04       | ICC = 0.47       | 0.04       | ICC = 0.56      | 0.04       | 3.00           | .22     |
| Lightheaded                                                                      | ICC = 0.48        | 0.04       | ICC = 0.43       | 0.04       | ICC = 0.55      | 0.04       | 4.37           | .11     |
| Nauseated                                                                        | ICC = 0.55        | 0.04       | ICC = 0.53       | 0.04       | ICC = 0.55      | 0.04       | 0.16           | .92     |
| Enjoyed it                                                                       | ICC = 0.56        | 0.04       | ICC = 0.45       | 0.04       | ICC = 0.50      | 0.04       | 3.61           | .16     |
| Coughing/choking                                                                 | ICC = 0.56        | 0.04       | ICC = 0.51       | 0.04       | ICC = 0.47      | 0.04       | 2.44           | .30     |
| Liked taste                                                                      | ICC = 0.55        | 0.04       | ICC = 0.50       | 0.04       | ICC = 0.47      | 0.04       | 1.81           | .41     |
| Felt bad                                                                         | ICC = 0.49        | 0.04       | ICC = 0.52       | 0.04       | ICC = 0.50      | 0.04       | 0.24           | .89     |
| Relaxed/calm                                                                     | ICC = 0.42        | 0.05       | ICC = 0.35       | 0.05       | ICC = 0.28      | 0.05       | 3.84           | .15     |
| Irritated throat                                                                 | ICC = 0.59        | 0.04       | ICC = 0.45       | 0.04       | ICC = 0.44      | 0.04       | 9.39           | .01     |
| Head rush/buzz                                                                   | ICC = 0.51        | 0.04       | ICC = 0.53       | 0.04       | ICC = 0.47      | 0.04       | 1.14           | .57     |
| Felt good                                                                        | ICC = 0.46        | 0.04       | ICC = 0.28       | 0.05       | ICC = 0.39      | 0.05       | 6.31           | .04     |
| Difficulty inhaling                                                              | ICC = 0.46        | 0.04       | ICC = 0.36       | 0.05       | ICC = 0.41      | 0.05       | 2.29           | .32     |
| Liked smell                                                                      | ICC = 0.50        | 0.04       | ICC = 0.52       | 0.04       | ICC = 0.47      | 0.04       | 0.79           | .68     |

**Note.** CI, confidence interval; ICC, intraclass correlation coefficient; SE, standard error;  $\kappa$  = kappa. Reliability was not calculated for respondent characteristic variables Age and Sex because variables were used for data integrity screening.

**Supplementary Table 3.** Median household hold income approximation comparison of test-retest reliability of self-report of respondent characteristics and tobacco use.

|                                          | Lower (n = 398) M = \$34,530, SD = \$5,160 |            | Middle (n = 398) M = \$48,678, SD = \$4,466 |            | Higher (n = 396) M = \$70,895, SD = \$13,200 |            | Median income comparison |         |
|------------------------------------------|--------------------------------------------|------------|---------------------------------------------|------------|----------------------------------------------|------------|--------------------------|---------|
|                                          | Reliability estimate                       | CI         | Reliability estimate                        | CI         | Reliability estimate                         | CI         | Chi-square               | P value |
| <b>Respondent characteristics</b>        |                                            |            |                                             |            |                                              |            |                          |         |
| Age                                      | $r = 0.99$                                 | .99, .99   | $r = 0.99$                                  | 0.99, 0.99 | $r = 0.99$                                   | 0.99, 0.99 |                          |         |
| Education                                | $\kappa = 0.91$                            | .87, .94   | $\kappa = 0.89$                             | 0.86, 0.93 | $\kappa = 0.89$                              | 0.85, 0.92 | 0.57                     | .75     |
| Race/ethnicity                           | $\kappa = 0.86$                            | .78, .94   | $\kappa = 0.90$                             | 0.84, 0.97 | $\kappa = 0.98$                              | 0.94, 1.00 | 9.53                     | <.01    |
| <b>Frequency of tobacco use</b>          |                                            |            |                                             |            |                                              |            |                          |         |
| Cigarettes                               | $\kappa = 0.43$                            | .29, .58   | $\kappa = 0.42$                             | 0.27, 0.58 | $\kappa = 0.42$                              | 0.29, 0.55 | 0.01                     | .99     |
| Cigars                                   | $\kappa = 0.54$                            | .36, .72   | $\kappa = 0.26$                             | 0.09, 0.43 | $\kappa = 0.46$                              | 0.31, 0.61 | 5.40                     | .07     |
| Smokeless                                | $\kappa = 0.76$                            | .60, .91   | $\kappa = 0.46$                             | 0.21, 0.71 | $\kappa = 0.57$                              | 0.39, 0.75 | 4.87                     | .09     |
| Pipe                                     | $\kappa = 0.70$                            | .51, .88   | $\kappa = 0.35$                             | 0.11, 0.58 | $\kappa = 0.43$                              | 0.23, 0.63 | 10.1                     | <.01    |
| <b>Early use of tobacco</b>              |                                            |            |                                             |            |                                              |            |                          |         |
| Age first tobacco use                    | $r = 0.87$                                 | .84, .89   | $r = 0.82$                                  | 0.78, 0.85 | $r = .88$                                    | 0.85, 0.90 | 2.08                     | .35     |
| Type of tobacco first tried, % cigarette | $\kappa = 0.63$                            | .39, .86   | $\kappa = 0.42$                             | 0.18, 0.66 | $\kappa = 0.49$                              | 0.27, 0.72 | 1.42                     | .49     |
| Amount used at first try <sup>a</sup>    | $\kappa = 0.36$                            | 0.25, 0.47 | $\kappa = 0.49$                             | 0.37, 0.61 | $\kappa = 0.28$                              | 0.15, 0.40 | 21.6                     | <.001   |

**Note.** CI, confidence interval, M, mean, SD, standard deviation. <sup>a</sup>Includes responses of *unsure* or *decline to state*. Otherwise excludes responses of *unsure* or *decline to state*.
